# Supplementary material for: Performance of large language models on advocating the management of meningitis: a comparative qualitative study
Source: HighWire-hosted journal article supplement (doi:10.1136/bmjhci-2023-100978), 2024-02-01
Supplement: bmjhci-2023-100978supp001_data_supplement.pdf [file bmjhci-2023-100978supp001_data_supplement.pdf]

**Performance of Large Language Models on advocating the management of meningitis: a comparative qualitative study**

Urs Fisch, MD, PhD<sup>1</sup>, Paulina Kliem, MD<sup>2</sup>, Pascale Grzonka, MD<sup>2</sup>, Raoul Sutter, MD<sup>1,2,3</sup>

<sup>1</sup>Department of Neurology, University Hospital Basel, Basel, Switzerland

<sup>2</sup>Clinic for Intensive Care Medicine, University Hospital Basel, Basel, Switzerland

<sup>3</sup>Medical faculty of the University of Basel, Switzerland

**Content:**

**S-1 Supplemental Table 1: Standardized prompts for individual sessions with the LLMs.**

**S-2 Supplemental Table 2: Definition of qualitative assessment of tasks reflecting good clinical practice and adherence to reference meningitis guidelines.**

**S-5 Supplemental Text: Full transcript of the first conversation with Bard and GTP-4.**

**Supplemental Table 1: Standardized prompts for individual sessions with the LLMs.**

Acronyms: CT = computed tomography; LLM = large language model.

| Prompt | Content                                                                                                                                                                                                                                                                                                                                                                                                                                                                                                                                                                                                                                                                                                                                                                                                                                                                                                                                                                                                                                                                                                                                     | Commentary                                                                                                                                                                                                                                                                           |
|--------|---------------------------------------------------------------------------------------------------------------------------------------------------------------------------------------------------------------------------------------------------------------------------------------------------------------------------------------------------------------------------------------------------------------------------------------------------------------------------------------------------------------------------------------------------------------------------------------------------------------------------------------------------------------------------------------------------------------------------------------------------------------------------------------------------------------------------------------------------------------------------------------------------------------------------------------------------------------------------------------------------------------------------------------------------------------------------------------------------------------------------------------------|--------------------------------------------------------------------------------------------------------------------------------------------------------------------------------------------------------------------------------------------------------------------------------------|
| 1      | You are an experienced medical assistant who gives the most accurate answers based on your knowledge. I am a junior medical doctor seeking your medical advice. A 52-year-old female patient presents with severe headache and confusion.<br>> What are the next steps?                                                                                                                                                                                                                                                                                                                                                                                                                                                                                                                                                                                                                                                                                                                                                                                                                                                                     | Asked in each session.                                                                                                                                                                                                                                                               |
| 2      | History: Her friend found her at her home 2 hours ago in a confused state and brought her to the hospital. She was last seen well yesterday. The patient is disoriented but states that she has severe headache and wishes to be alone. Further history taking is not possible due to her confused state. Her friend says she has type 2 diabetes, arterial hypertension and migraine with aura.<br><br>Physical examination: She appears lethargic. She opens her eyes to pain only. She is disoriented to date, place and the current situation. She can only follow simple commands. All extremities have a fast downward drift when held in the air. She has a rhythmic pulse of 120/minute and a respiratory rate of 20/min with peripheral O <sub>2</sub> saturation of 95%. Her blood pressure is 125/85 mmHg and her temperature is 38.7 °C. Upon auscultation, her heart and lungs are clear. Bowel sounds are normal. Her abdomen is soft and non-tender, with no flank pain. Her neck is not stiff. She has a tender red spot behind her right ear.<br><br>> Provide me with a detailed step-wise recommendation how to proceed. | Asked in each session.<br><br>Additional details of physical examination were provided only if the LLM specifically requested for it.<br>These were: pupil status (response: normal examination), coordination testing (response: dysmetria), gait (response: testing not feasible). |
| 3      | > Do I have to wait for a CT scan of the head before performing the lumbar puncture?<br>> Do I have to wait to administer antibiotics until I have done the lumbar puncture?                                                                                                                                                                                                                                                                                                                                                                                                                                                                                                                                                                                                                                                                                                                                                                                                                                                                                                                                                                | Asked in each session.                                                                                                                                                                                                                                                               |
| 4      | > Provide me with the exact dosages of antibiotics.                                                                                                                                                                                                                                                                                                                                                                                                                                                                                                                                                                                                                                                                                                                                                                                                                                                                                                                                                                                                                                                                                         | Asked in each session.                                                                                                                                                                                                                                                               |
| 5      | > Is there anything else I need to consider regarding the treatment or workup of this patient?                                                                                                                                                                                                                                                                                                                                                                                                                                                                                                                                                                                                                                                                                                                                                                                                                                                                                                                                                                                                                                              | Asked in each session.                                                                                                                                                                                                                                                               |

**Supplemental Table 2: Definition of qualitative assessment of tasks reflecting good clinical practice and adherence to reference meningitis guidelines.**

Acronyms: CNS = central nervous system; CT = computed tomography, ENT = Ear, nose and throat; ESCMID = European Society of Clinical Microbiology and Infectious Diseases; IDSA = Infectious Diseases Society of America; LLM = large language model; LP = Lumbar puncture; MRI = magnetic resonance imaging.

\* These tasks were not considered for the performance assessment due to different definitions by the reference guidelines.

| Task                                     | Definition of Accomplishment                                                                                                                                                                   | Background / Details                                                                                                                                                                                                                                                                                                                                                                                     |
|------------------------------------------|------------------------------------------------------------------------------------------------------------------------------------------------------------------------------------------------|----------------------------------------------------------------------------------------------------------------------------------------------------------------------------------------------------------------------------------------------------------------------------------------------------------------------------------------------------------------------------------------------------------|
| Urgent work-up                           | The LLM provides substantial commentary on expedited diagnostic procedures by terms such as "urgent", "STAT", "rapid", "immediate", etc. to denote the immediacy and speed of these processes. | Delay in the initiation of therapy in bacterial meningitis patients is strongly associated with death and poor outcome <sup>11,13</sup> .                                                                                                                                                                                                                                                                |
| History, physical exam, vital parameters | Medical history of the current problem, physical examination and measuring vital parameters (pulse, blood pressure, respiratory rate) is suggested by the LLM after prompt 1.                  | Clinical evaluation of patients with acute symptoms should consist of obtaining the medical history, a physical examination and vital parameters.                                                                                                                                                                                                                                                        |
| Glucose measurement                      | Glucose measurement is suggested by the LLM.                                                                                                                                                   | In patients with acutely altered mental status, especially those with known diabetes mellitus, a derangement of glucose metabolism should be rapidly excluded.                                                                                                                                                                                                                                           |
| Blood cultures                           | Obtaining blood samples for microbiological culture is suggested by the LLM after prompt 1 or 2.                                                                                               | If there is suspicion of acute bacterial meningitis, blood cultures must be obtained immediately <sup>13</sup> , before the first dose of antibiotics is administered <sup>11</sup> .                                                                                                                                                                                                                    |
| Imaging                                  | Cranial CT or MRI is suggested by the LLM as a response to prompt 1 or prompt 2.                                                                                                               | The differential diagnosis for acutely altered mental status is broad and includes other acute brain disorders beside CNS infection, such as stroke or subarachnoid hemorrhage. Cranial imaging is indicated in such a situation. Further, cerebral imaging can demonstrate complications of CNS infection such as edema or hydrocephalus, which require additional therapeutic measures <sup>12</sup> . |
| LP                                       | LP is suggested by the LLM as a response to prompt 1 or 2.                                                                                                                                     | In patients with suspected bacterial meningitis, it is strongly recommended to determine CSF leukocyte count, protein and glucose concentration, and to perform CSF culture and Gram stain <sup>11,13</sup> .                                                                                                                                                                                            |
| No unrecommended tests                   | Any initial diagnostic test suggested by the LLM after prompt 1 or 2 which is not reflected by the reference guidelines for the given scenario <sup>11,13</sup> .                              | A summary of the suggested diagnostic tests is provided in Table 3 of the systematic review by Sigfrid et al. (2019) <sup>14</sup> .                                                                                                                                                                                                                                                                     |

|                                         |                                                                                                                                                                                                                                                    |                                                                                                                                                                                                                                                                                                                                                                                                                                                                                               |
|-----------------------------------------|----------------------------------------------------------------------------------------------------------------------------------------------------------------------------------------------------------------------------------------------------|-----------------------------------------------------------------------------------------------------------------------------------------------------------------------------------------------------------------------------------------------------------------------------------------------------------------------------------------------------------------------------------------------------------------------------------------------------------------------------------------------|
| No misleading statements                | Either erroneous conclusions by the LLM of specific information or wrongful statements which contradict general knowledge or recommendations by the reference guidelines <sup>11,13</sup> .                                                        |                                                                                                                                                                                                                                                                                                                                                                                                                                                                                               |
| Differential diagnosis: CNS infection   | Clear statement indicating infection of the CNS, such as "Meningitis", "Encephalitis", "Meningoencephalitis", or "Brain abscess" by the LLM as a response to prompt 1 or prompt 2.                                                                 | In adults, the most common clinical characteristics of bacterial meningitis are fever, headache, neck stiffness and altered mental status. However, these can be absent and therefore bacterial meningitis should not be ruled out solely on the absence of such typical symptoms <sup>11</sup> .                                                                                                                                                                                             |
| Differential diagnosis: mastoiditis     | LLM includes mastoiditis in its differential diagnoses and/or suggests specific work-up (imaging with purpose of investigating mastoiditis, otoscopy, ear nose throat consultation, etc).                                                          | A search for an infectious focus is crucial and patients should be examined for otitis media or mastoiditis <sup>12</sup> . Cranial imaging for other diagnostic purposes such as the detection of mastoiditis or sinusitis should be performed. <sup>11</sup> 30/12/2023 14:16:00                                                                                                                                                                                                            |
| Correct choice of empirical antibiotics | The LLM provide assertively a correct choice of empirical antibiotic treatment when specifically asked. For a patient >50 years with diabetes mellitus, an initial empirical antibiotic treatment should cover for <i>Listeria monocytogenes</i> . | According to ESCMID <sup>11</sup> : Ceftriaxone or cefotaxime, amoxicillin or ampicillin or Penicillin G, optionally vancomycin or rifampicin if reduced <i>Streptococcus pneumoniae</i> antimicrobial sensitivity is suspected: vancomycin 20–60 mg/kg/day or rifampicin 600mg/d.<br><br>According to IDSA <sup>13</sup> : ceftriaxone or cefotaxime, ampicillin, vancomycin.                                                                                                                |
| Correct dosing of antibiotics           | Correct dosing of empirical antibiotic treatment is suggested by the LLM as a response to prompt 4 for an adult patient >50 years with diabetes mellitus.                                                                                          | According to ESCMID <sup>11</sup> : Ceftriaxone 4g/day or cefotaxime 8-12g/day, amoxicillin or ampicillin 12g/day or Penicillin G. If reduced <i>Streptococcus pneumoniae</i> antimicrobial sensitivity: vancomycin 20–60 mg/kg/day or rifampicin 600mg/d.<br>According to IDSA <sup>13</sup> : ceftriaxone 4g/day or cefotaxime 8-12g/day, ampicillin 12g/day, vancomycin 30–45 mg/kg/day.                                                                                                   |
| No delay of antibiotics administration  | Statement by the LLM that antibiotics should be administered promptly without unnecessary delay.                                                                                                                                                   | Strong recommendation to start antibiotic therapy as soon as possible. The time period until antibiotics are administered should be less than 1 hour <sup>11</sup> . Whenever lumbar puncture is delayed, e.g. due to cranial imaging, empiric treatment must be started immediately on clinical suspicion, even if the diagnosis has not been established <sup>11,13</sup> .                                                                                                                 |
| Antiviral treatment                     | Antiviral treatment is suggested by the LLM to be considered as a conjunctive to antibacterial treatment.                                                                                                                                          | The clinical findings of bacterial meningitis overlap with those of meningitis caused by viruses. Clinical judgement is key when considering whether to start empiric antibiotic and adjunctive therapy <sup>11</sup> .<br>The diagnosis of viral encephalitis is suspected in the context of a febrile disease accompanied by headache, altered level of consciousness and signs of cerebral dysfunction. Treatment with acyclovir should be commenced on clinical suspicion <sup>15</sup> . |
| Correct dosing of antiviral drugs       | If antiviral treatment is suggested by the LLM, the LLM states the correct dose.                                                                                                                                                                   | Acyclovir 10mg/kg three times a day <sup>15</sup> .                                                                                                                                                                                                                                                                                                                                                                                                                                           |

|                                                                              |                                                                                                                                                                                                                  |                                                                                                                                                                                                                                                                                                                                                                                                                                                                                                                                                                                                                                                                                                                                         |
|------------------------------------------------------------------------------|------------------------------------------------------------------------------------------------------------------------------------------------------------------------------------------------------------------|-----------------------------------------------------------------------------------------------------------------------------------------------------------------------------------------------------------------------------------------------------------------------------------------------------------------------------------------------------------------------------------------------------------------------------------------------------------------------------------------------------------------------------------------------------------------------------------------------------------------------------------------------------------------------------------------------------------------------------------------|
| Dexamethasone                                                                | Dexamethasone is suggested by the LLM as a conjunctive to anti-infective treatment.                                                                                                                              | <p>Empiric treatment with dexamethasone is strongly recommended for all adults with acute bacterial meningitis in the setting of high-income countries with the first dose of antibiotic treatment<sup>11</sup>.</p> <p>In adults with suspected or proven pneumococcal meningitis, dexamethasone should be administered before or concomitant with the first dose of antimicrobial therapy<sup>13</sup>.</p>                                                                                                                                                                                                                                                                                                                           |
| Cranial imaging before LP *                                                  | Clear statement by the LLM as a response to prompt 3 whether cranial imaging should be performed before the LP or not.                                                                                           | <p>Indication for cranial imaging before LP according to ESCMID<sup>11</sup>:<br/>Strong recommendation only if focal neurologic deficits (excluding cranial nerve palsies), new-onset seizure, severely altered mental status (GCS &lt;10), severely immunocompromised state. In patients lacking these characteristics, cranial imaging before lumbar puncture is not recommended.</p>                                                                                                                                                                                                                                                                                                                                                |
| Case-specific explanation for decision regarding cranial imaging before LP * | The LLM provides a comprehensible case-specific explanation for its decision regarding the necessity for cranial imaging before LP which reflects recommendations by the reference guidelines <sup>11,13</sup> . | <p>Indication for cranial imaging before LP according to IDSA<sup>13</sup>: immunocompromised state, history of CNS disease, new onset seizure, papilledema, abnormal level of consciousness, focal neurologic deficit (including dilated nonreactive pupil, abnormalities of ocular motility, abnormal visual fields, gaze palsy, arm or leg drift).<br/>Strong recommendation to start antibiotic therapy as soon as possible. The time period until antibiotics are administered should be less than 1 hour<sup>11</sup>. Whenever lumbar puncture is delayed, e.g. due to cranial imaging, empiric treatment must be started immediately on clinical suspicion, even if the diagnosis has not been established<sup>11,13</sup>.</p> |
| Antibiotic treatment before LP *                                             | The LLM suggests antibiotic treatment before the LP if it recommended to perform a CT scan prior.                                                                                                                | <p>Antibiotic treatment in patients with acute bacterial meningitis should be started as soon as possible, and the time period from entering the hospital to initiation of antibiotic treatment should not exceed 1 hour<sup>11</sup>.<br/>Whenever lumbar puncture is delayed, e.g., due to cranial CT, empiric treatment should be started upon clinical suspicion beforehand after obtaining blood cultures<sup>11,13</sup>.</p>                                                                                                                                                                                                                                                                                                     |

**Supplemental Text: Full transcript of the first conversation with Bard and GTP-4 (user prompts in bold).**Bard

**You are an experienced medical assistant who gives the most accurate answers based on your knowledge. I am a junior medical doctor seeking your medical advice. A 52-year-old female patient presents to the hospital with severe headache and confusion.**

**> What are the next steps?**

Hi there, junior medical doctor.

The next steps for a 52-year-old female patient who presents to the hospital with severe headache and confusion include:

- 1 A complete history and physical examination. This will help to determine the cause of the headache and confusion, as well as any other underlying medical conditions.
- 2 Laboratory tests. These may include a complete blood count, blood chemistry, urinalysis, and imaging studies such as a CT scan or MRI of the brain.
- 3 Treatment. The treatment for a severe headache and confusion will depend on the underlying cause. However, in some cases, treatment may include medication to relieve pain, anti-convulsants to prevent seizures, or antibiotics to treat an infection.

It is important to note that the next steps for a patient with severe headache and confusion may vary depending on the individual patient's symptoms and medical history. However, the steps outlined above are a good starting point for any patient who presents with these symptoms.

Here are some additional things to keep in mind:

- The patient should be monitored closely for changes in their condition.
- The patient should be treated for any underlying medical conditions that are found.
- The patient should be educated about the signs and symptoms of a stroke or other serious medical emergencies.

I hope this helps!

**History: Her friend found her at her home 2 hours ago in a confused state and brought her to the hospital. She was last seen well yesterday. The patient is disoriented but states that she has severe headache and wishes to be alone. Further history taking is not possible due to her confused state. Her friend says she has type 2 diabetes, arterial hypertension and migraine with aura. Physical examination: She appears lethargic. She opens her eyes to pain only. She is disoriented to date, place and the current situation. She can only follow simple commands. All extremities have a fast downward drift when held in the air. She has a rhythmic pulse of 120/minute and a respiratory rate of 20/min with peripheral O<sub>2</sub> saturation of 95%. Her blood pressure is 125/85 mmHg and her temperature is 38.7 °C. Upon auscultation, her heart and lungs are clear. Bowel sounds are normal. Her abdomen is soft and non-tender, with no flank pain. Her neck is not stiff. She has a tender red spot behind her right ear.**

**> Provide me with a detailed step-wise recommendation how to proceed.**

Sure, here is a detailed step-wise recommendation on how to proceed with this patient:

- 1 Complete a full neurological examination. This will assess the patient's level of consciousness, orientation, and motor function. It is important to note that the patient's mental status may be altered due to her headache and confusion, so it is important to be as objective as possible in your assessment.
- 2 Order a complete blood count, blood chemistry, urinalysis, and chest X-ray. These tests will help to rule out any underlying medical conditions that could be causing the patient's symptoms.
- 3 Order a CT scan or MRI of the brain. These imaging studies will help to visualize the brain and look for any signs of stroke, tumor, or other structural abnormalities.
- 4 Start the patient on IV fluids and anti-convulsants. This will help to prevent seizures and keep the patient hydrated.
- 5 Monitor the patient closely for changes in their condition. This includes monitoring their vital signs, neurological status, and fluid balance.

If the patient's condition does not improve with treatment, or if they develop any new symptoms, you may need to consider other diagnostic tests or treatment options.

Here are some additional things to keep in mind:

- The patient's friend should be interviewed to get more information about the patient's medical history and the events leading up to her presentation to the hospital.
- The patient's family should be informed about her condition and the plan of care.
- The patient should be educated about the signs and symptoms of a stroke or other serious medical emergencies.

I hope this helps!

- > **Do I have to wait for a CT scan of the head before performing the lumbar puncture?**
- > **Do I have to wait to administer antibiotics until I have done the lumbar puncture?**

The decision of whether or not to wait for a CT scan of the head before performing a lumbar puncture is a complex one that depends on a number of factors, including the patient's clinical presentation, the results of their initial laboratory tests, and the availability of imaging resources.

In general, if the patient has a clear indication for a lumbar puncture, such as a suspected meningitis or encephalitis, then the lumbar puncture should be performed as soon as possible. This is because a delay in diagnosis and treatment can have serious consequences, such as permanent neurological damage or death. However, if the patient's clinical presentation is less clear, or if the availability of imaging resources is limited, then it may be prudent to wait for a CT scan of the head before performing a lumbar puncture. This is because a CT scan can help to rule out other conditions that can mimic meningitis or encephalitis, such as a subarachnoid hemorrhage or a brain tumor.

The decision of whether or not to wait to administer antibiotics until after the lumbar puncture is also a complex one. In general, if the patient has a high clinical suspicion for meningitis or encephalitis, then antibiotics should be started as soon as possible. This is because the delay in treatment can have serious consequences, such as permanent neurological damage or death.

However, if the patient's clinical presentation is less clear, or if there is a concern about the possibility of a subarachnoid hemorrhage, then it may be prudent to wait for the results of the lumbar puncture before starting antibiotics. This is because antibiotics can obscure the results of the lumbar puncture, making it difficult to diagnose meningitis or encephalitis.

Ultimately, the decision of whether or not to wait for a CT scan of the head before performing a lumbar puncture, or whether or not to wait to administer antibiotics until after the lumbar puncture, is a clinical one that should be made on a case-by-case basis.

Here are some additional factors to consider when making these decisions:

- The patient's age and overall health status.
- The patient's clinical presentation.
- The results of the patient's initial laboratory tests.
- The availability of imaging resources.
- The patient's wishes.

It is important to consult with a qualified healthcare professional to make the best decision for each individual patient.

#### > **Provide me with the exact dosages of antibiotics**

The exact dosages of antibiotics for meningitis will vary depending on the patient's age, weight, and other medical conditions. However, the following are some general guidelines:

- Ceftriaxone: 1 g IV every 24 hours for adults and children over 12 years old.
- Cefotaxime: 2 g IV every 8 hours for adults and children over 12 years old.
- Ampicillin: 2 g IV every 4 hours for adults and children over 12 years old.
- Penicillin G: 20 million units IV every 4 hours for adults and children over 12 years old.

It is important to note that these are just general guidelines, and the specific dosages of antibiotics will need to be determined by a qualified healthcare professional.

Here are some additional things to keep in mind:

- Antibiotics should be started as soon as possible after diagnosis.
- Antibiotics should be continued for at least 7 days, or longer if the patient is not responding to treatment.
- Patients should be monitored closely for side effects of antibiotics, such as rashes, diarrhea, and nausea.

I hope this helps!

#### > **Is there anything else I need to consider regarding the treatment or workup of this patient?**

Yes, there are a few other things to consider regarding the treatment or workup of this patient:

- The patient's age and overall health status. Meningitis can be more serious in young children and older adults, so it is important to consider their age and overall health status when making treatment decisions.
- The patient's clinical presentation. The patient's clinical presentation can provide clues about the underlying cause of their meningitis. For example, patients with meningococcal meningitis often have a more rapid and severe course of illness than patients with pneumococcal meningitis.
- The results of the patient's laboratory tests. The results of the patient's laboratory tests can help to confirm the diagnosis of meningitis and identify the organism responsible for the infection.

- The availability of imaging resources. Imaging resources, such as a CT scan or MRI of the brain, can help to rule out other conditions that can mimic meningitis, such as a subarachnoid hemorrhage or a brain tumor.
  - The patient's wishes. It is important to discuss the patient's wishes for treatment with them and their family. This includes discussing the risks and benefits of different treatment options, as well as the patient's goals of care.
- I hope this helps!

#### GTP-4

**> You are an experienced medical assistant who gives the most accurate answers based on your knowledge. I am a junior medical doctor seeking your medical advice. A 52-year-old female patient presents to the hospital with severe headache and confusion. What are the next steps?**

The symptoms presented by this patient - severe headache and confusion - could be caused by a range of conditions. These might be as varied as migraines, meningitis, encephalitis, a stroke, a brain tumor, or other neurological conditions. As a junior medical doctor, you should follow a systematic approach to evaluate the patient. Here's a suggested approach:

- 1 **Immediate Stabilization** If the patient appears acutely ill, ensure her vital signs are stable (blood pressure, heart rate, respiration rate, oxygen saturation, temperature). If she is unstable, follow the hospital's emergency protocol.
- 2 **Detailed History** Get a detailed history. Try to identify when the headache started, any accompanying symptoms, if there was any triggering event, any similar past history, any medication she is currently on, and any chronic illnesses.
- 3 **Physical Examination** Perform a thorough physical examination including a detailed neurological examination. This should include testing cranial nerves, motor and sensory function, reflexes, coordination and gait. Also look for signs of infection (like neck stiffness, fever), trauma, and other systemic illnesses.
- 4 **Differential Diagnosis** Based on the history and physical examination, list your differential diagnoses. These might include but are not limited to: migraine, tension headache, cluster headache, brain tumor, stroke, meningitis, encephalitis, or brain abscess.
- 5 **Laboratory and Imaging Studies** You might need to order some lab tests and imaging studies depending on your differential diagnoses. Commonly used tests could be CBC, blood culture, liver function test, coagulation profile, CT or MRI of the brain. If an infection like meningitis is suspected, a lumbar puncture might be needed.
- 6 **Consultation** Depending on the suspected diagnoses, you might need to consult with specialists like a neurologist or infectious disease specialist.
- 7 **Treatment** Start treatment based on your most likely diagnosis. For instance, if a stroke is suspected, the patient needs immediate intervention. If an infection is suspected, start empirical antibiotics while waiting for culture report.

This is a general outline and the actual steps might vary depending on the patient's condition and the hospital's protocol. You should always discuss with your seniors or specialists whenever in doubt. Remember that severe headache with confusion is potentially serious and needs to be evaluated urgently.

**History:** Her friend found her at her home 2 hours ago in a confused state and brought her to the hospital. She was last seen well yesterday. The patient is disoriented but states that she has severe headache and wishes to be alone. Further history taking is not possible due to her confused state. Her friend says she has type 2 diabetes, arterial hypertension and migraine with aura.

**Physical examination:** She appears lethargic. She opens her eyes to pain only. She is disoriented to date, place and the current situation. She can only follow simple commands. All extremities have a fast downward drift when held in the air. She has a rhythmic pulse of 120/minute and a respiratory rate of 20/min with peripheral O<sub>2</sub> saturation of 95%. Her blood pressure is 125/85 mmHg and her temperature is 38.7 °C. Upon auscultation, her heart and lungs are clear. Bowel sounds are normal. Her abdomen is soft and non-tender, with no flank pain. Her neck is not stiff. She has a tender red spot behind her right ear. Cranial nerves and reflexes and sensory function to touch are normal. Coordination tests show dysmetria. Gait testing is not possible due to her condition. There are no signs of trauma or other systemic illnesses.

**> Provide me with a detailed step-wise recommendation how to proceed.**

Based on the history and physical examination, your patient is showing signs of altered mental status with confusion and lethargy, indicating potential encephalopathy. The fever suggests a possible infection. The tender

red spot behind her ear might indicate an infection such as mastoiditis, which could potentially lead to a brain abscess or meningitis. The dysmetria and drift in all extremities suggest a central nervous system involvement. Here's a step-by-step approach on how to proceed:

1 **Immediate Stabilization** The patient's vital signs are relatively stable, but she needs to be monitored closely due to her confused state and fever. Ensure she is safe and comfortable. Administer oxygen if necessary (if SpO<sub>2</sub> falls <94%).

2 **Laboratory Tests** Order the following:

- CBC: To check for infection or other hematological conditions.
- Blood Culture: If bacteremia is suspected.
- Blood Glucose: Given the history of diabetes.
- Liver and Renal Function Tests: To evaluate metabolic causes of encephalopathy.
- Coagulation Profile: As she could be a candidate for lumbar puncture.
- CRP/ESR: These markers can help identify an ongoing inflammation or infection.
- Urinalysis: To rule out urinary tract infection, which can cause confusion in older patients.

3 **Imaging Studies**

- CT Head: Urgently needed to rule out stroke, brain abscess, or other structural brain diseases. Given the history of arterial hypertension, it's important to rule out intracerebral hemorrhage.
- CT/MRI Temporal Bone: If mastoiditis is suspected from the tender red spot behind the ear.

4 **Lumbar Puncture** If imaging does not reveal a contraindication (like raised intracranial pressure), perform a lumbar puncture to rule out meningitis, encephalitis, or other CNS infections.

5 **Treatment**

- Start empirical antibiotics after taking appropriate cultures, given the fever and possible infection source from the red spot behind the ear.
- Treat other abnormalities found in lab results.

6 **Consultation**

- Consult Neurology: Given the altered mental status and neurological findings.
- Consult Infectious Disease: If the infection is confirmed or highly suspected.
- Consult ENT: If mastoiditis is suspected.

7 **Monitoring**

- Monitor her vital signs, mental status, and neurological function closely.
- Regularly reassess the patient and adjust the treatment based on lab and imaging results and consultation inputs.

This is a serious situation, and the patient needs to be evaluated and managed urgently. It's important to communicate and coordinate with your team and the consulting specialists, and to keep the patient's family or friend informed in a sensitive and appropriate manner.

**> Do I have to wait for a CT scan of the head before performing the lumbar puncture? > Do I have to wait to administer antibiotics until I have done the lumbar puncture?**

1 **CT Scan Before Lumbar Puncture:** In general, it is recommended to perform a CT scan before a lumbar puncture if there are signs that suggest the patient may have elevated intracranial pressure, focal neurological deficits, papilledema, altered level of consciousness, or if the patient is immunocompromised. The concern is that a lumbar puncture in the presence of increased intracranial pressure could potentially lead to brain herniation, a life-threatening condition. In this patient, given the altered mental status and neurological findings, it would be prudent to perform a CT scan of the head before a lumbar puncture.

2 **Administering Antibiotics Before Lumbar Puncture:** If bacterial meningitis is suspected, it is recommended to start antibiotics as soon as possible, even before lumbar puncture is performed, if it's going to be delayed. Rapid administration of antibiotics can be life-saving. However, it's important to collect blood cultures before starting antibiotics if possible. In this patient, given the fever and potential source of infection, starting empirical antibiotics after taking appropriate cultures would be a reasonable decision. If a lumbar puncture cannot be performed immediately (for example, if waiting for the CT scan results), this should not delay the initiation of antibiotics.

Remember, these decisions should be made in collaboration with the wider healthcare team, including senior doctors and consulting specialists, and should take into account the specific condition and stability of the patient.

**> Provide me with the exact dosages of antibiotics**

The choice of antibiotic and the dose will depend on the suspected organism and the patient's weight, renal function, and allergies. Given that this patient may have a central nervous system infection and possibly a concurrent ear infection (mastoiditis), broad-spectrum coverage is needed.

Here is a typical regimen:



- 1 Ceftriaxone: 2g IV every 12 hours. This is a third-generation cephalosporin that covers a wide range of organisms including *Streptococcus pneumoniae* and *Neisseria meningitidis*, common causes of bacterial meningitis in adults.
- 2 Vancomycin: 15-20 mg/kg IV every 8-12 hours (not to exceed 2g/dose). This provides coverage for methicillin-resistant *Staphylococcus aureus* (MRSA) and *Streptococcus pneumoniae* resistant to cephalosporins.
- 3 Amoxicillin: 2g IV every 4 hours. This is added to cover *Listeria monocytogenes*, which could be a consideration given the patient's age.
- 4 Acyclovir: 10 mg/kg IV every 8 hours. This is added to cover for possible herpes encephalitis, until it can be ruled out.

Please note: This is a broad and general antibiotic regimen for serious CNS infections. The exact choice of antibiotics and dosages should be tailored to the patient's individual needs (including considerations such as allergies and renal function) and local antibiotic resistance patterns. The regimen should be adjusted based on culture results and consultation with Infectious Disease specialists.

In addition, due to the patient's confusion and lethargy, it's important to assess her swallowing reflex before administering oral medications. If her swallowing function is compromised, she might require a nasogastric tube for medication administration and nutrition, or the medications may need to be administered intravenously. Also, don't forget to provide supportive care like antipyretics for fever and analgesics for headache. Monitor all vital signs and glucose levels closely, especially considering the patient's history of diabetes.

**> Is there anything else I need to consider regarding the treatment or workup of this patient?**

Aside from the points previously mentioned, here are a few additional considerations:

- 1 Neurology Consultation: If not already done, a consultation with a neurologist would be beneficial. They can provide further insight into the neurological findings and help guide the management of the patient's condition.
- 2 Infectious Disease Consultation: Specialists in infectious disease can provide valuable input on antibiotic choice and duration of therapy, particularly if the patient doesn't respond to initial empiric therapy or if rare pathogens are suspected.
- 3 Monitoring Glucose Levels: Given the patient's history of diabetes, it is essential to monitor her blood glucose levels regularly. The stress of illness can cause significant fluctuation in glucose levels, and both hyperglycemia and hypoglycemia can worsen her confusion.
- 4 Review Medications: Review all current medications the patient is on. Certain drugs might contribute to her confusion, or interact with the treatments you are planning to give.
- 5 Nutrition and Hydration: Ensure the patient's nutritional needs are met. This can be challenging if she is lethargic and potentially unable to swallow. Consider the need for a nasogastric tube for feeding if necessary. Hydration is also important, particularly as fever can increase insensible water loss.
- 6 Follow-Up Imaging and Labs: Depending on the findings of the initial CT scan and laboratory tests, follow-up imaging or additional laboratory tests may be needed.
- 7 Reassessment: The patient should be reassessed regularly. If she doesn't improve or if she worsens on the current management plan, reassessment of the diagnosis and treatment plan will be necessary.
- 8 Communication: Keep open communication with the patient's family members or friends to update them about the patient's condition, while respecting patient confidentiality.
- 9 Documentation: Be sure to document all findings, decisions, and communication in the patient's medical record.

It's important to remember that each patient is unique, and while these are general steps and considerations, the exact approach should be tailored to the individual patient's condition and response to treatment.
